# Supplementary material for: Outcome of Critically Ill COVID-19 Patients According to the Setting of Corticosteroid Initiation—A Retrospective Observational Cohort Study
Source: MDPI journal article supplement (doi:10.3390/jpm11121359), 2021-12-13
Supplement: s1 [file s1]

**Table S1.** Characteristics and outcomes of 228 critically ill COVID-19 patients managed with corticosteroid therapy according to the dose regimen used.

| Variable                                                             | Overall<br>( <i>n</i> = 228) | D6 regimen<br>( <i>n</i> = 112) | D20/10 regimen ( <i>n</i> = 116) | <i>p</i> -Value |
|----------------------------------------------------------------------|------------------------------|---------------------------------|----------------------------------|-----------------|
| <b>Demographics and Comorbidities</b>                                |                              |                                 |                                  |                 |
| Age (years)                                                          | 67 (56–74)                   | 69 (57–77)                      | 64 (56–73)                       | 0.04            |
| Male gender, <i>n</i> (%)                                            | 168 (74)                     | 85 (76)                         | 83 (72)                          | 0.55            |
| Past hypertension, <i>n</i> (%)                                      | 119 (52)                     | 61 (55)                         | 58 (50)                          | 0.51            |
| Diabetes mellitus, <i>n</i> (%)                                      | 84 (37)                      | 42 (38)                         | 42 (36)                          | 0.89            |
| Ischemic heart disease, <i>n</i> (%)                                 | 26 (11)                      | 10 (9)                          | 16 (14)                          | 0.30            |
| Body-mass index (kg/m <sup>2</sup> )                                 | 28.5 (25.4–32.9)             | 27.9 (24.4–32.0)                | 28.9 (26.1–34.1)                 | 0.02            |
| Tobacco smoking, <i>n</i> (%)                                        | 16 (7)                       | 4 (4)                           | 12 (10)                          | 0.07            |
| <b>Parameters on ICU Admission</b>                                   |                              |                                 |                                  |                 |
| SOFA score *                                                         | 4 (2–5)                      | 4 (3–5)                         | 4 (2–6)                          | 0.44            |
| Blood lactate (mmol/L) *                                             | 1.3 (1.0–1.7)                | 1.3 (1.0–1.7)                   | 1.3 (1.0–1.8)                    | 0.81            |
| PaO <sub>2</sub> /FiO <sub>2</sub> ratio (mmHg) *                    | 111 (78–171)                 | 135 (87–188)                    | 97 (75–148)                      | 0.008           |
| Serum C-reactive protein (mg/L) *                                    | 140 (78–220)                 | 151 (82–224)                    | 134 (73–207)                     | 0.24            |
| Serum procalcitonin (ng/mL) *                                        | 0.26 (0.12–0.75)             | 0.30 (0.14–1.18)                | 0.21 (0.11–0.56)                 | 0.06            |
| White blood cells (G/L) *                                            | 8.5 (6.2–11.2)               | 8.4 (6.1–10.7)                  | 8.7 (6.2–11.5)                   | 0.48            |
| Peripheral lymphocytes (G/L) *                                       | 0.8 (0.5–1.0)                | 0.7 (0.5–1.0)                   | 0.8 (0.6–1.1)                    | 0.15            |
| Peripheral neutrophils (G/L) *                                       | 7.0 (5.0–9.5)                | 6.8 (5.0–9.5)                   | 7.3 (5.0–9.5)                    | 0.96            |
| Serum interleukin-6 concentration (pg/mL) *                          | 63.4 (20.6–150.1)            | 59.1 (27.2–141.1)               | 65.8 (19.0–161.1)                | 0.95            |
| Invasive mechanical ventilation on ICU admission day *               | 39 (17)                      | 16 (14)                         | 23 (20)                          | 0.30            |
| Vasopressors, <i>n</i> (%) *                                         | 26 (11)                      | 9 (8)                           | 17 (15)                          | 0.15            |
| vvECMO, <i>n</i> (%) *                                               | 13 (6)                       | 1 (1)                           | 12 (10)                          | 0.003           |
| Time from hospital to ICU admission (days)                           | 1 (0–4)                      | 1 (0–5)                         | 1 (0–4)                          | 0.69            |
| <b>Corticosteroid Treatment and Additional Therapies in the ICU</b>  |                              |                                 |                                  |                 |
| Time from symptoms to corticosteroids (days)                         | 7 (5–10)                     | 7 (5–10)                        | 8 (5–11)                         | 0.24            |
| Corticosteroid initiation setting, <i>n</i> (%)                      |                              |                                 |                                  |                 |
| before ICU admission (Cb-group)                                      | 63 (28)                      | 33 (30)                         | 30 (26)                          | 0.54            |
| after ICU admission (Ca-group)                                       | 165 (72)                     | 79 (70)                         | 86 (74)                          |                 |
| Total duration of corticosteroid treatment (days)                    | 10 (10–14)                   | 10 (10–14)                      | 10 (10–15)                       | 0.27            |
| Tocilizumab, <i>n</i> (%)                                            | 79 (35)                      | 16 (14)                         | 63 (54)                          | <0.001          |
| Hydroxychloroquine/azithromycin combination, <i>n</i> (%)            | 35 (15)                      | 0 (0.0)                         | 35 (30)                          | <0.001          |
| Invasive mechanical ventilation, <i>n</i> (%)                        | 111 (49)                     | 48 (43)                         | 63 (54)                          | 0.09            |
| Prone positioning, <i>n</i> (%)                                      | 99 (49)                      | 42 (45)                         | 57 (51)                          | 0.40            |
| Number of proning sessions                                           | 3 (1–5)                      | 2 (1–3)                         | 3 (1–5)                          | 0.40            |
| Nitrogen oxide, <i>n</i> (%)                                         | 47 (21)                      | 20 (18)                         | 27 (24)                          | 0.33            |
| vvECMO, <i>n</i> (%)                                                 | 31 (14)                      | 11 (10)                         | 20 (17)                          | 0.12            |
| Renal replacement therapy, <i>n</i> (%)                              | 42 (19)                      | 22 (20)                         | 20 (17)                          | 0.73            |
| <b>ICU Complications and Outcome</b>                                 |                              |                                 |                                  |                 |
| Hospital-acquired infection, <i>n</i> (%)                            | 100 (44)                     | 49 (44)                         | 51 (44)                          | 1               |
| Number of hospital-acquired infection episodes                       | 2 (1–3)                      | 2 (1–2)                         | 2 (1–3)                          | 0.35            |
| Number of days alive free of mechanical ventilation at day 28 (days) | 7 (0–28)                     | 28 (1–28)                       | 20 (0–28)                        | 0.58            |
| Survival to hospital discharge, <i>n</i> (%)                         | 141 (62)                     | 68 (61)                         | 73 (63)                          | 0.79            |

\* Parameters measured at intensive care unit admission. Dexamethasone dose regimen consisting of 6 mg/day for 10 days (the D6 regimen) or 20 mg/day for 5 days followed by 10 mg/day for 5 days (the D10/20 regimen). ICU, intensive care unit; vvECMO, venovenous extracorporeal membrane oxygenation; SOFA, sequential organ failure assessment.
